# Supplementary material for: Association of sugar consumption with risk of depression and anxiety: a systematic review and meta-analysis
Source: Front Nutr. 2024 Oct 16;11:1472612. doi: 10.3389/fnut.2024.1472612 (PMC11522855; doi:10.3389/fnut.2024.1472612)
Supplement: Supplementary file 7 [file Table_4.xlsx]

## Sheet: Sheet1
Supplementary Table 4 Quality Scores of the included literature
Cross-sectional study		AHRQ											Total score	Quality level
	Study	Define the source of information (survey, record review)	List inclusion and exclusion criteria for exposed and unexposed subjects (cases and controls) or refer to previous publications	Indicate time period used for identifying patients	Indicate whether or not subjects were consecutive if not population-based	Indicate if evaluators of subjective components of study were masked to other aspects of the status of the participants	Describe any assessments undertaken for quality assurance purposes (e.g., test/retest of primary outcome measurements)	Explain any patient exclusions from analysis	Describe how confounding was assessed and/or controlled	If applicable, explain how missing data were handled in the analysis	Summarize patient response rates and completeness of data collection	Clarify what follow-up, if any, was expected and the percentage of patients for which incomplete data or follow-up was obtained
1	Chenchen Gao 2021	YES	UNClEAR	YES	UNClEAR	YES	YES	YES	YES	YES	YES	YES	9	High
2	Jiyeong Kim 2022	YES	YES	YES	YES	NO	NO	YES	YES	YES	YES	YES	8	High
3	Ji-Myung Kim 2021	YES	YES	YES	YES	NO	NO	YES	YES	YES	YES	NO	7	Medium
4	Anika Knüppel 2017	YES	YES	YES	YES	UNClEAR	YES	YES	YES	YES	YES	YES	9	High
5	Irina Lazarevich 2017	YES	YES	YES	UNClEAR	YES	NO	YES	YES	UNClEAR	YES	YES	7	Medium
6	Lijun Li 2024	YES	YES	YES	YES	UNClEAR	NO	YES	YES	YES	YES	YES	8	High
7	Ping Li 2022	YES	YES	YES	YES	UNClEAR	NO	YES	YES	YES	YES	NO	8	High
8	Bao-Peng Liu 2022	YES	YES	YES	YES	YES	YES	YES	YES	YES	UNClEAR	NO	8	High
9	Yating Luo 2023	YES	YES	YES	UNClEAR	YES	NO	YES	NO	YES	YES	NO	7	Medium
10	Nathalie Michels 2021	YES	YES	YES	YES	YES	NO	NO	YES	YES	YES	NO	8	High
11	Subin PARK 2018	YES	YES	YES	YES	YES	NO	NO	YES	UNClEAR	YES	NO	7	Medium
12	M. Ángeles Pérez-Ara 2020	YES	YES	YES	UNClEAR	YES	NO	YES	YES	YES	YES	YES	9	High
13	Jin Suk Ra 2023	YES	YES	YES	YES	NO	NO	YES	YES	YES	YES	NO	8	High
14	Norhafizah Sahril 2023	YES	YES	YES	YES	YES	NO	YES	YES	UNClEAR	NO	NO	7	Medium
15	Zumin Shi 2010	YES	YES	YES	YES	UNClEAR	NO	YES	YES	UNClEAR	YES	NO	7	Medium
16	Eunbi Sim 2019	YES	UNClEAR	YES	YES	YES	NO	YES	YES	UNClEAR	YES	NO	7	Medium
17	Kamilla Tavares de Sousa 2020	YES	YES	YES	YES	YES	NO	YES	YES	UNClEAR	YES	NO	8	High
18	Rachel A. Wattick 2018	YES	YES	YES	NO	YES	NO	YES	YES	YES	YES	NO	8	High
19	Xinyi Xie 2024	YES	YES	YES	YES	NO	NO	YES	YES	YES	YES	YES	9	High
20	Honglv Xu 2020	YES	YES	YES	YES	YES	NO	NO	YES	UNClEAR	YES	NO	7	Medium
21	Hui-Rang Yim 2021	YES	YES	YES	YES	NO	NO	NO	YES	NO	YES	NO	6	Medium
22	Bin Yu 2015	YES	YES	YES	YES	NO	NO	YES	YES	YES	YES	NO	8	High
23	Danqing Hu 2019	YES	YES	YES	YES	UNClEAR	NO	YES	YES	NO	YES	NO	7	Medium
24	Jiangli Li 2022	YES	YES	YES	YES	NO	NO	NO	YES	YES	YES	NO	7	Medium
25	Supa Pengpid 2019	YES	NO	YES	YES	NO	NO	YES	YES	NO	YES	NO	6	Medium
26	Hoda Zahedi 2014	YES	YES	YES	YES	NO	NO	NO	YES	YES	YES	NO	7	Medium
27	Chung Bui 2023	YES	YES	YES	YES	NO	NO	YES	YES	NO	YES	NO	7	Medium
28	Géraldine M. Camilleri 2014	YES	YES	YES	YES	YES	NO	YES	YES	YES	YES	YES	10	High
29	Zuzanna Chrzastek 2020	YES	YES	YES	UNClEAR	NO	YES	YES	UNClEAR	YES	YES	NO	7	Medium
30	Aya Fujiwara 2022	YES	YES	YES	NO	NO	NO	YES	YES	YES	YES	NO	7	Medium
31	Karl Peltzer 2018	YES	YES	YES	YES	NO	NO	YES	YES	YES	YES	NO	8	High
32	Zohreh Sadat Sangsefidi 2020	YES	YES	YES	YES	NO	NO	YES	YES	YES	UNClEAR	NO	7	Medium
33	Lu Zhang 2024	YES	YES	YES	YES	NO	YES	YES	YES	YES	YES	NO	9	High
explain:"NO" or "UNCLEAR", the score of "0"; If the answer is "YES", then the project score of "1". Article quality evaluation is: the low quality = 0 to 3; Medium quality = 4 to 7; High quality = 8-11
cohort study		NOS Cohort 评分								Total score
		Selection				Comparability	Outcome
	Study	Representativeness of the exposed cohort	Selection of the non exposed cohort	Demonstration that outcome of interest was not present at start of study	Ascertainment of exposure	Comparability of cohorts on the basis of the design or analysis	Assessment of outcome	Was follow-up long enough for outcomes to occur	Adequacy of follow up of cohorts
1	Xuguang Guo 2014	*	*	*	*	*	*	*	0	7
2	Chun-Ji Lin 2024	*	*	*	*	**	*	*	0	8
3	Nao Shimmura 2021	0	*	*	*	**	*	*	0	7
4	Erin Hoare 2016	*	*	0	*	**	*	*	0	7
5	Ikuko Kashino 2022	*	*	0	*	**	*	*	0	7
6	Junko Kose 2022	*	*	*	*	**	*	*	0	8
case control		NOS case control评分								Total score
		Selection				Comparability	Exposure
	Study	Is the case definition adequate?	Representativeness of the cases	Selection of Controls	Definition of Controls	Comparability of cases and controls on the basis of the design or analysis	Ascertainment of exposure	Same method of ascertainment for cases and controls	Non-Response rate
1	G. Grases 2019	*	*	*	*	*	*	*	*	8
